# Supplementary material for: Responsive hydrogel-based microneedle dressing for diabetic wound healing
Source: Royal Society of Chemistry journal article supplement (doi:10.1039/d2tb00126h), 2022-01-01
Supplement: d2tb00126h1.pdf [file d2tb00126h1.pdf]

## Supplementary Information

### Responsive hydrogel-based microneedle dressing for diabetic wound healing

Zhaoyang Guo<sup>1#</sup>, Haiyang Liu<sup>1#</sup>, Zhekun Shi<sup>1</sup>, Lulu Lin<sup>2</sup>, Yinping Li<sup>2</sup>, Miao Wang<sup>3\*</sup>,  
Guoqing Pan<sup>3</sup>, Yifeng Lei<sup>1,4\*</sup>, Longjian Xue<sup>1</sup>

<sup>1</sup> School of Power and Mechanical Engineering & The Institute of Technological Science,  
Wuhan University, Wuhan 430072, China

<sup>2</sup> School of Basic Medical Sciences, Wuhan University, Wuhan 430071, China

<sup>3</sup> Institute for Advanced Materials, School of Materials Science and Engineering, Jiangsu  
University, Zhenjiang 212013, China

<sup>4</sup> Wuhan University Shenzhen Research Institute, Shenzhen 518057, China

# These authors contributed equally to this work

\* Corresponding authors: yifenglei@whu.edu.cn (Y.L.), wangmiao@ujs.edu.cn (M.W.)

## Supplementary figures

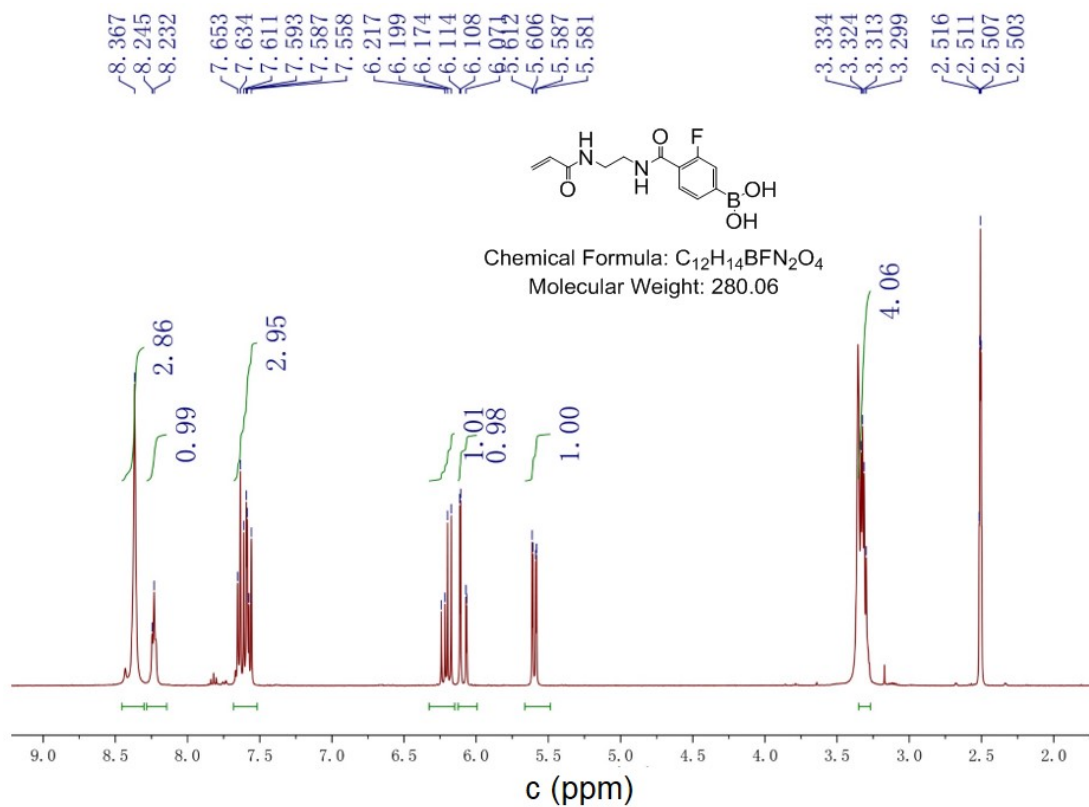

**Figure S1.** NMR spectrum of the synthesized AFPBA molecule.

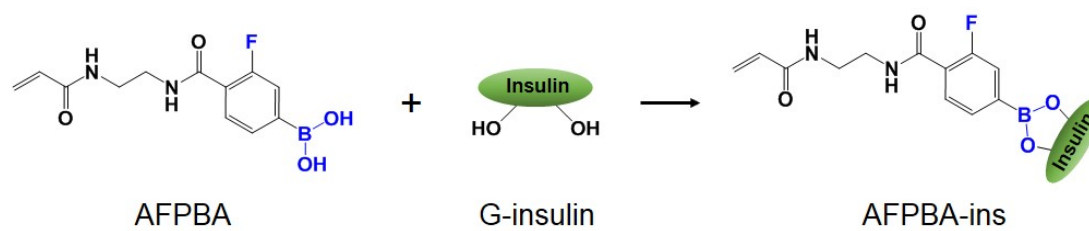

**Figure S2.** Schematic illustration of grafting G-insulin onto the AFPBA molecule to obtain AFPBA-ins complex.

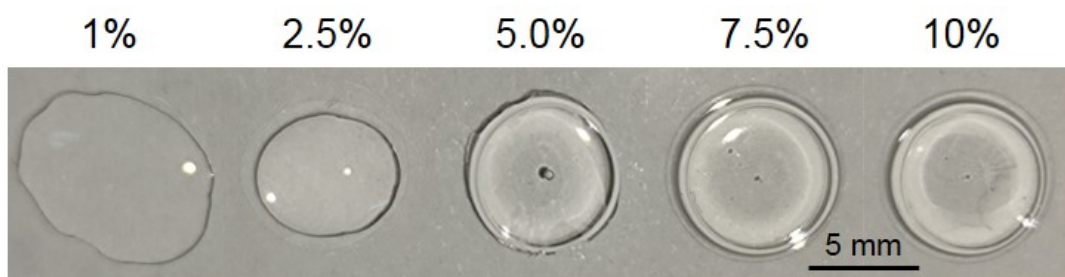

**Figure S3.** Morphology of GelMa hydrogels with different concentration.

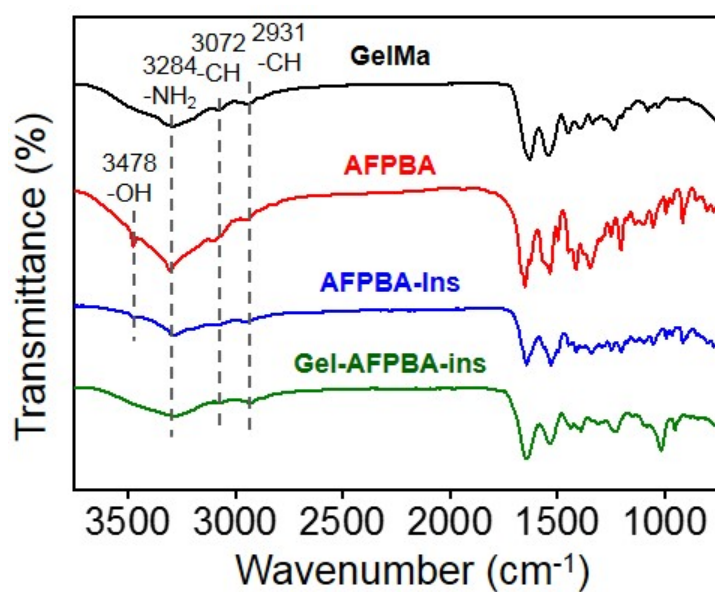

**Figure S4.** FTIR wide spectra during the preparation of Gel-AFPBA-ins hydrogels.

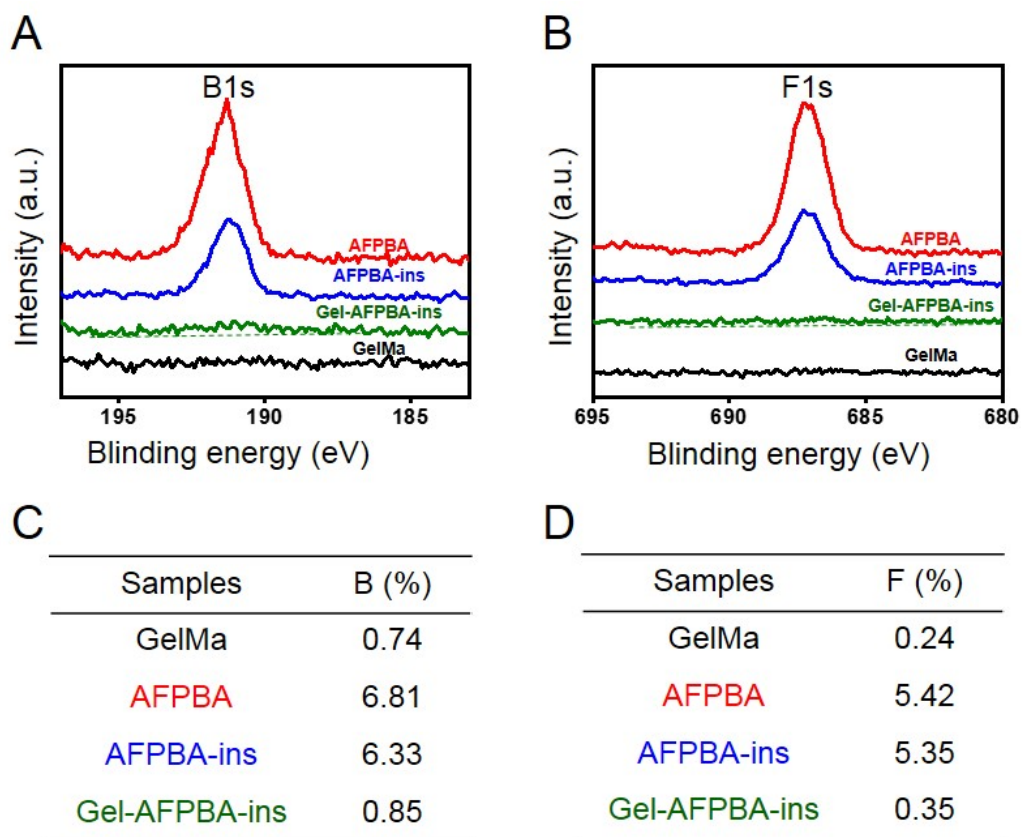

**Figure S5.** XPS analysis of the hydrogels. (A-B) High-resolution XPS spectra of B1s (A) and F1s (B). (C-D) Elemental analysis during the preparation of hydrogels, including B element (C) and F element (D).

## Supplementary Tables

**Table S1.** BG levels in diabetic mice with different treatments

| Group<br>Time | Control    | Gel-blk    | Gel-ins    | Gel-AFPBA-ins |
|---------------|------------|------------|------------|---------------|
| 0 day         | 16.6 ± 2.1 | 16.3 ± 1.6 | 15.4 ± 1.2 | 15.7 ± 3.8    |
| 1 day         | 20.5 ± 1.2 | 17.1 ± 2.3 | 13.3 ± 2.0 | 14.4 ± 3.8    |
| 2 days        | 21.1 ± 4.1 | 18.5 ± 1.6 | 16.6 ± 4.7 | 15.9 ± 2.6    |
| 3 days        | 21.9 ± 3.9 | 19.2 ± 3.6 | 19.9 ± 2.3 | 16.2 ± 2.9    |
| 4 days        | 21.8 ± 0.8 | 18.8 ± 0.2 | 18.9 ± 3.9 | 18.5 ± 4.2    |
| 5 days        | 21.0 ± 3.1 | 21.9 ± 2.8 | 19.6 ± 4.8 | 18.4 ± 3.1    |
| 6 days        | 21.9 ± 3.0 | 19.7 ± 3.9 | 19.1 ± 4.9 | 18.1 ± 4.2    |
| 7 days        | 22.1 ± 1.9 | 19.9 ± 2.4 | 17.8 ± 3.2 | 17.5 ± 1.3    |
| 8 days        | 21.5 ± 1.9 | 20.5 ± 4.9 | 17.8 ± 1.4 | 16.8 ± 4.0    |
